# Supplementary material for: Alterations of the Ca2+ signaling pathway in pancreatic beta-cells isolated from db/db mice
Source: PubMed Central journal article supplement (PMC4180459; doi:10.1007/s13238-014-0075-7), 2014-07-24
Supplement: 13238_2014_75_MOESM1_ESM.pdf [file 13238_2014_75_MOESM1_ESM.pdf]

ONLINE SUPPLEMENTARY MATERIAL

**Calculations to estimate the total amount of  $\text{Ca}^{2+}$  released during the ER  $\text{Ca}^{2+}$  content and the ER  $\text{Ca}^{2+}$  permeability.**

Cells were bathed in a series of solution changes to evoke two kinds of  $[\text{Ca}^{2+}]_i$  transients as described in text and Fig. 4A. The first represented  $\text{Ca}^{2+}$  released from the ER when SERCA was blocked with BHQ and the second following a KCl depolarization permitted calculation of extrusion by the PMCA ( $J_{\text{PMCA}}$ ) as a function of  $[\text{Ca}^{2+}]_i$  (Fig. 4B). Because the calcium flux changes induced by the initial BHQ application ( $J_{\text{BHQ}}(t)$ ) were a result of both release from the ER ( $J_{\text{release}}$ ) and  $\text{Ca}^{2+}$  extrusion via the PMCA, the  $J_{\text{release}}(t)$  had to be calculated as the difference between  $J_{\text{BHQ}}$  and  $J_{\text{PMCA}}$  at each time point (Fig. 4C). The drop in the ER  $\text{Ca}^{2+}$  concentration ( $[\text{Ca}^{2+}]_{\text{ER}}$ ) at different time points was calculated based on the equation:

$$\Delta[\text{Ca}^{2+}]_{\text{ER}}(t) = -\frac{v_i}{v_{\text{ER}}\kappa_{\text{ER}}} \int_t^{\text{end}} J_{\text{release}} \kappa_i dt = -\frac{v_i}{v_{\text{ER}}\kappa_{\text{ER}}} \Delta[\text{Ca}^{2+}]_{\text{ER}}^i(t)$$

(21), in which  $v_i$  and  $v_{\text{ER}}$  are the volumes of the cytoplasm and the ER, respectively, and  $\kappa_i$  and  $\kappa_{\text{ER}}$  are the calcium binding ratios of the cytoplasm and the ER, respectively. Assuming that  $[\text{Ca}^{2+}]_{\text{ER}}$  equilibrates with  $[\text{Ca}^{2+}]_i$  after BHQ application, we calculated the initial content in the ER according to the equation:

$$[\text{Ca}^{2+}]_{\text{ER}}^i(0) = [\text{Ca}^{2+}]_{i,\text{end}} \kappa_i + \int_0^{\text{end}} J_{\text{release}} \kappa_i dt$$

The change in  $[\text{Ca}^{2+}]_{\text{ER}}$  over time is defined as

$$[\text{Ca}^{2+}]_{\text{ER}}^i(t) = [\text{Ca}^{2+}]_{\text{ER}}^i(0) - \int_0^{\text{end}} J_{\text{release}} \kappa_i dt,$$

as shown in Fig. 4D. The relative permeability of the ER was estimated according to the equation,

$$P_{\text{ER}}(t) \left[ \frac{v_i}{v_{\text{ER}}\kappa_{\text{ER}}} \right] \approx -\frac{J_{\text{release}}(t)}{[\text{Ca}^{2+}]_{\text{ER}}^i(t)} \text{ (Fig. 4E) (21).}$$
